# Supplementary material for: Prospective Evaluation of a Rapid Clinical Metagenomics Test for Bacterial Pneumonia
Source: Front Cell Infect Microbiol. 2021 Oct 19;11:684965. doi: 10.3389/fcimb.2021.684965 (PMC8560692; doi:10.3389/fcimb.2021.684965)
Supplement: Supplementary file 5 [file DataSheet_5.xlsx]

## Sheet: 34% （98）both fail
Study ID	Gender	Age	Type of infection	ICU admission	Temp （℃）	Cough	Sputum	Dyspnea	Invasive mechanical ventilation	Immune Suppression	Prior Antibitoics	Current smoker	Virus detection	Virus results	WBC（× 109/L）	NEUT（× 109/L）	LYMPH（× 109/L）	HGB（g/L）	PLT（× 109/L）	PCT（ng/mL）	Outcome
AA4	Male	80	CAP-ICH	Yes	39.5	Yes	Yes	No	No	Yes	Yes	No	Yes	EBV	153.6	/	/	93	25	0.58	3
AA6	Male	79	CAP-ICH	Yes	38.5	Yes	Yes	No	Yes	Yes	Yes	No	Yes	EBV、RSV	21.48	6.55	11.91	81	188	2.36	3
AB8	Female	63	AEBX	No	37	Yes	Yes	No	No	No	Yes	No	No	/	4.14	2.9	0.93	109	191	0.18	3
AE11	Male	55	CAP	Yes	38	No	No	No	Yes	No	Yes	Yes	No	/	8.88	6.21	2.09	73	104	0.2	3
AE12	Male	39	AEBX	No	36.7	Yes	Yes	No	No	No	Yes	No	Yes	Negative	4.57	2.76	1.14	128	136	0.28	3
AE2	Male	85	CAP	Yes	38	Yes	Yes	No	Yes	No	Yes	No	Yes	EBV	6.76	6.28	0.3	67	162	1.08	3
AF11	Male	61	CAP	Yes	37.8	Yes	Yes	No	No	No	Yes	Yes	Yes	Influenza virus A	10.19	8.66	1.13	160	117	0.77	3
AG4	Male	75	CAP	Yes	38.7	Yes	Yes	Yes	Yes	No	Yes	No	Yes	Negative	7.68	6.68	0.49	97	186	1.65	2
AI11	Male	60	Lung abscess	No	38.8	Yes	Yes	No	No	Yes	Yes	Yes	No	/	5.48	3.73	1.03	78	591	0.35	1
AM6	Female	61	CAP-ICH	Yes	39	No	Yes	No	Yes	Yes	Yes	No	Yes	Negative	2.09	1.56	0.36	58	28	3.33	1
AN10	Male	30	AEBX	No	37.5	Yes	Yes	No	No	No	Yes	No	Yes	Negative	8.8	5.87	1.91	144	325	0.17	3
AN11	Male	76	AECOPD	No	36	Yes	Yes	No	No	No	No	No	Yes	Negative	6.2	4.81	0.65	124	205	0.2	3
AN3	Male	73	CAP	Yes	40	No	No	Yes	Yes	No	Yes	Yes	Yes	HCMV	11.91	9.73	1.18	92	145	0.83	1
AQ1	Male	72	AECOPD	Yes	39	Yes	Yes	Yes	Yes	No	No	Yes	Yes	Influenza virus A、HCMV、EBV	15.79	14.97	0.19	107	139	0.36	2
AR10	Male	37	CAP-ICH	No	37	Yes	Yes	No	No	Yes	No	Yes	Yes	HCMV	4.13	2.54	1.13	122	224	0.25	3
AR13	Male	76	HAP	Yes	36	Yes	Yes	No	Yes	No	Yes	No	No	/	16.05	14.4	0.52	143	126	0.14	3
AR8	Female	41	AEBX	No	36.5	No	No	Yes	No	No	Yes	No	Yes	Negative	26.26	24.29	1.02	113	376	0.3	3
AS2	Female	72	CAP	Yes	36.5	Yes	Yes	Yes	Yes	No	Yes	No	Yes	HCMV	17.97	14.51	2.67	117	322	0.53	1
AT2	Female	56	AEBX	No	37.7	Yes	Yes	No	No	No	Yes	No	Yes	Negative	6.4	3.8	1.94	85	208	0.21	3
AU3	Female	31	CAP	Yes	37.9	Yes	Yes	Yes	No	No	Yes	No	Yes	Negative	13.32	8.87	2.71	126	321	0.16	3
AU6	Female	61	AEBX	Yes	40	Yes	Yes	No	No	No	Yes	No	Yes	Influenza virus A	8.37	6.39	1.47	129	215	0.32	3
AV5	Male	64	Lung abscess	No	38.5	Yes	Yes	No	No	No	Yes	No	No	/	8.92	7.6	0.63	110	483	0.54	3
AV7	Male	71	HAP	Yes	38	Yes	Yes	No	No	Yes	Yes	No	Yes	Influenza virus A	9.42	7.36	1.37	71	236	0.42	3
AW4	Male	38	CAP-ICH	No	39.5	Yes	No	No	No	Yes	Yes	Yes	Yes	EBV	8.79	6.9	1.57	129	247	0.29	3
AW6	Male	76	CAP	Yes	39.3	Yes	Yes	No	No	No	Yes	No	Yes	Negative	19.51	18.93	0.41	118	360	2.18	3
AW9	Male	24	CAP	No	38.7	Yes	Yes	No	No	No	Yes	No	Yes	Negative	12.93	11.12	0.99	95	57	0.75	3
AX12	Female	82	HAP	No	39	Yes	Yes	No	No	No	Yes	No	Yes	Influenza virus A	8.28	6.02	1.37	125	263	3.31	3
AY1	Male	84	CAP	Yes	38	Yes	Yes	Yes	Yes	No	No	No	Yes	Influenza virus A	7.74	6.7	0.48	125	75	13.57	1
AY9	Male	24	AEBX	No	36.4	Yes	Yes	Yes	No	No	Yes	Yes	Yes	Negative	11.97	9.86	1.48	148	328	0.21	3
AZ5	Female	87	CAP	No	38.5	Yes	Yes	No	No	No	Yes	No	Yes	EBV	9.55	7.36	1.49	90	276	0.21	3
BA11	Male	54	AEBX	No	40.5	Yes	Yes	No	No	No	Yes	No	Yes	Negative	5.68	4.41	0.8	131	281	0.3	3
BA15	Male	67	CAP-ICH	Yes	40	Yes	Yes	No	No	Yes	Yes	No	Yes	HCMV	15.65	13.9	1.01	76	241	27.07	3
BB15	Male	59	Lung abscess	No	38.1	Yes	Yes	No	No	No	Yes	Yes	No	/	12.54	10.07	1.59	120	335	0.17	3
BB2	Female	48	AEBX	No	36.5	Yes	Yes	No	No	No	No	No	Yes	Negative	3.04	1.2	1.38	122	226	/	3
BB8	Male	56	HAP	Yes	38	Yes	Yes	No	No	No	Yes	Yes	Yes	Negative	26.38	23.95	1.4	98	236	0.51	1
BD8	Male	31	CAP	Yes	39	Yes	Yes	Yes	No	No	Yes	Yes	Yes	Negative	22.25	19.64	0.89	102	275	7.99	3
BH11	Male	63	AECOPD	No	36.5	Yes	Yes	No	No	No	Yes	Yes	No	/	6.9	6.29	0.5	145	178	0.22	3
CB4	Male	68	AEBX	No	36.8	Yes	Yes	No	No	No	Yes	No	No	/	6.48	4.8	1.04	128	194	0.23	3
CF4	Female	45	CAP	No	39.2	Yes	Yes	No	No	No	Yes	No	Yes	Negative	17.65	14.82	2.1	130	197	/	3
CH3	Male	36	Lung abscess	No	36.5	Yes	Yes	No	No	No	Yes	Yes	No	/	10.39	8.19	1.17	131	332	0.33	3
CH7	Male	79	CAP	Yes	38.7	No	No	No	No	No	Yes	No	Yes	Negative	10.1	8.29	1.34	162	150	9.4	3
CI6	Male	48	CAP	No	36	Yes	Yes	Yes	No	No	No	Yes	Yes	Negative	6.82	3.73	2.36	111	311	0.31	3
CN13	Male	39	HAP	Yes	37	No	No	No	Yes	No	Yes	No	Yes	Negative	7.15	5.66	1.03	165	264	0.31	3
CN6	Female	66	CAP	Yes	37.7	Yes	Yes	Yes	Yes	No	Yes	No	Yes	EBV、HCMV	34.95	31.9	1.57	72	498	1.37	3
CN9	Male	49	CAP	No	38.6	Yes	Yes	Yes	No	No	Yes	Yes	Yes	Influenza virus A	20.33	17.48	1.33	126	365	0.43	3
CQ6	Male	53	CAP	Yes	38.5	Yes	Yes	Yes	Yes	No	Yes	No	Yes	Negative	10.87	9.27	0.55	130	170	11.87	3
CS14	Male	62	HAP	No	38.6	Yes	Yes	No	No	Yes	Yes	Yes	Yes	Negative	6.91	5.23	1.02	82	275	0.37	3
CS7	Female	63	CAP-ICH	No	37	Yes	Yes	No	No	Yes	Yes	No	Yes	EBV	8.05	5.41	1.94	94	316	0.37	3
CT6	Female	63	HAP	Yes	37.6	Yes	Yes	Yes	No	Yes	Yes	No	Yes	EBV	11.21	10.19	0.68	130	150	0.29	3
CT7	Female	83	CAP	No	38	Yes	Yes	No	No	No	No	No	No	/	2.32	0.97	1.02	99	196	0.35	3
CU1	Female	64	CAP-ICH	Yes	39	Yes	Yes	Yes	Yes	Yes	Yes	No	Yes	Influenza virus A、EBV	9.55	8.01	0.78	95	233	0.9	2
CV5	Male	32	CAP	No	37.8	No	No	No	No	No	Yes	Yes	Yes	Negative	9.46	6.89	1.82	152	340	0.3	3
CV9	Male	72	CAP-ICH	Yes	39.8	No	No	Yes	No	Yes	Yes	No	Yes	Influenza virus A	5.83	5.13	0.6	90	76	1.07	3
DC5	Male	77	CAP	Yes	38.8	Yes	Yes	No	Yes	No	Yes	No	Yes	Negative	6.67	4.93	0.87	93	148	1.9	1
DC7	Male	78	AEBX	No	36.7	Yes	Yes	No	No	No	Yes	No	No	/	8.12	6.41	1.28	125	308	0.13	3
DE3	Female	89	AECOPD	No	37	Yes	Yes	No	No	No	Yes	No	No	/	5.91	4.08	1.27	115	157	/	3
DJ14	Male	52	Lung abscess	No	37	Yes	Yes	No	No	No	Yes	Yes	No	/	12.67	10.46	1.43	118	299	0.19	3
DJ5	Male	73	AECOPD	Yes	39.8	Yes	Yes	No	No	Yes	Yes	No	Yes	Negative	12.71	10.86	0.62	137	146	4.69	3
DJ8	Male	60	Lung abscess	No	38.9	Yes	Yes	No	No	No	Yes	Yes	No	/	9.6	7.57	1.04	121	291	0.19	3
DK9	Male	30	CAP	No	37.8	Yes	Yes	No	No	No	Yes	Yes	Yes	Negative	5.38	3.93	1.04	151	288	0.26	3
DL9	Female	57	CAP	No	38.5	Yes	No	No	No	No	Yes	No	No	/	7.52	4.68	2.02	130	217	0.34	3
DO10	Male	87	CAP	No	38.2	Yes	Yes	No	No	No	Yes	Yes	No	/	8.36	6.79	0.55	88	89	0.6	3
DO2	Male	73	CAP	Yes	37.5	Yes	Yes	Yes	No	No	Yes	No	Yes	Negative	9.77	7.83	0.57	77	221	0.64	3
DT14	Female	79	HAP	Yes	37.3	No	No	No	No	No	Yes	No	No	/	8.99	7.15	1.35	69	451	0.14	3
DT17	Male	81	CAP	Yes	38	Yes	Yes	Yes	Yes	No	Yes	No	Yes	EBV	12.87	12.15	0.42	91	306	0.82	1
DU10	Female	31	CAP	No	39.4	Yes	Yes	Yes	No	No	Yes	No	Yes	Negative	4.49	2.59	1.67	99	284	/	3
DV2	Male	46	CAP	No	38.8	Yes	Yes	No	No	No	Yes	Yes	Yes	Negative	16.65	13.98	1.21	115	233	0.74	3
EC4	Male	83	CAP-ICH	Yes	37.5	Yes	Yes	No	No	Yes	Yes	No	Yes	Negative	6.07	4.88	0.73	92	144	0.18	3
EC8	Male	61	CAP	No	36.1	Yes	Yes	No	No	No	No	Yes	Yes	EBV	5.08	2.53	1.85	141	263	/	3
ED3	Male	65	CAP-ICH	Yes	38	No	No	No	No	Yes	Yes	No	Yes	HCMV	3.79	1.97	1.5	57	89	0.88	3
EE2	Male	32	CAP	No	39.1	Yes	Yes	No	No	No	Yes	No	Yes	Negative	13.89	11.86	1.23	122	236	/	3
EE3	Male	15	Lung abscess	No	40.9	Yes	Yes	No	No	No	Yes	No	Yes	Negative	3.47	1.41	1.52	126	329	/	3
EE4	Male	68	AEBX	No	37	Yes	Yes	Yes	No	No	Yes	No	Yes	Negative	5.8	4.16	1.24	86	339	0.12	3
EH5	Female	77	CAP	No	38.5	Yes	Yes	No	No	No	Yes	No	Yes	Negative	7	4.34	2.08	109	127	/	3
EL1	Male	21	Lung abscess	No	39	Yes	Yes	No	No	No	Yes	Yes	Yes	Negative	5.07	2.67	2.12	130	304	0.03	3
EL18	Male	63	Lung abscess	No	36.5	Yes	Yes	No	No	No	Yes	Yes	Yes	Negative	4.72	3.23	1.14	109	155	0.12	3
EM3	Male	64	CAP	Yes	39.2	Yes	Yes	Yes	Yes	No	Yes	No	Yes	Negative	5.58	4.64	0.37	101	157	0.46	1
EM4	Male	54	HAP	Yes	39.3	Yes	Yes	Yes	Yes	No	Yes	No	Yes	Influenza virus A	19.1	16.75	1.43	108	284	0.02	3
ET2	Male	64	AECOPD	No	37	Yes	Yes	No	No	No	Yes	No	Yes	Negative	7.92	5.72	1.49	152	244	0.03	3
ET3	Male	51	AEBX	No	36.5	Yes	Yes	No	No	No	No	No	Yes	Negative	7.27	5.31	1.51	146	274	/	3
FB1	Male	81	AECOPD	No	38	Yes	Yes	No	No	No	Yes	No	Yes	EBV	8.14	6.77	0.58	138	286	/	1
FF1	Male	69	CAP	Yes	39.2	Yes	Yes	No	Yes	No	Yes	No	Yes	EBV	7.19	4.49	1.53	126	384	0.11	3
FF5	Female	69	CAP-ICH	Yes	38.3	Yes	Yes	Yes	No	Yes	Yes	No	Yes	Negative	9.79	8.08	1.02	128	200	0.33	3
L10	Male	64	AECOPD	No	36.6	Yes	Yes	Yes	No	No	Yes	No	No	/	8.49	5.47	2.23	112	425	0.19	3
L2	Male	71	AECOPD	No	38	Yes	Yes	Yes	No	No	Yes	No	Yes	Negative	7.32	6.06	0.72	123	156	0.14	3
O8	Male	63	HAP	Yes	37	Yes	Yes	No	Yes	No	Yes	No	No	/	16.97	14.53	1.09	65	154	1.31	2
P8	Male	60	Lung abscess	No	37.4	Yes	Yes	No	No	No	Yes	Yes	Yes	Negative	8.36	5.9	1.96	114	284	0.29	3
P9	Male	42	AEBX	No	36.6	Yes	Yes	Yes	No	No	Yes	No	No	/	7.26	4.56	1.98	143	423	0.15	3
R3	Male	69	AECOPD	No	38.5	Yes	Yes	No	No	No	Yes	No	No	/	7.29	5.27	1.34	120	465	0.16	3
S2	Male	86	CAP-ICH	Yes	38.1	No	No	No	Yes	Yes	No	No	Yes	Negative	10.8	8.11	0.94	120	370	0.32	1
S3	Male	46	AEBX	No	36.5	Yes	Yes	No	No	No	Yes	No	No	/	6.43	3.89	1.8	132	251	0.2	3
S4	Female	36	CAP-ICH	Yes	38.5	Yes	Yes	No	No	Yes	Yes	No	No	/	3.35	2.94	0.17	92	177	4.44	3
T14	Male	75	CAP	Yes	39	Yes	Yes	Yes	Yes	No	Yes	No	Yes	EBV	24.03	22.6	0.69	128	169	9.03	3
T3	Male	74	CAP	Yes	39.6	Yes	Yes	Yes	Yes	No	Yes	No	Yes	EBV	8.1	7.8	0.21	106	102	1.61	2
T8	Male	61	CAP-ICH	No	38.5	Yes	Yes	No	No	Yes	No	No	Yes	Influenza virus A、HCMV、EBV、Parainfluenza virus	5.79	4.22	1.1	135	370	0.17	3
W6	Male	61	CAP	No	36.3	Yes	Yes	No	No	No	No	Yes	No	/	7.27	3.74	2.5	127	266	/	3
Y1	Female	71	CAP-ICH	Yes	37.5	Yes	Yes	No	Yes	Yes	Yes	No	Yes	HCMV	13.25	11.42	1.29	96	78	0.75	1
Y11	Female	23	CAP	No	40	Yes	Yes	No	No	No	Yes	No	Yes	Negative	5	2.93	1.56	109	307	0.19	3
Note：EBV：Epstein-Barr virus；RSV：Respiratory Syncytial Virus；HCMV：Human cytomegalovirus
Outcome:1,In-hospital mortality; 2,Withdrawal of life support; 3,Hospital discharge

## Sheet: 45% （131）culture positive
Study ID	Gender	Age	Type of infection	ICU admission	Temp （℃）	Cough	Sputum	Dyspnea	Invasive mechanical ventilation	Immune Suppression	Prior Antibitoics	Current smoker	Virus detection	Virus results	WBC（× 109/L）	NEUT（× 109/L）	LYMPH（× 109/L）	HGB（g/L）	PLT（× 109/L）	PCT（ng/mL）	Outcome
AB3	Male	54	AEBX	No	38.9	Yes	Yes	No	No	No	Yes	Yes	Yes	Negative	9.11	6.17	2	150	277	0.24	3
AC11	Male	78	HAP	Yes	37	Yes	Yes	No	No	No	Yes	No	No	/	7.67	4.97	1.94	76	244	0.13	3
AD7	Male	71	AECOPD	No	39	Yes	Yes	Yes	No	No	Yes	No	Yes	HCMV	8.36	6.75	0.85	103	267	0.22	3
AF17	Male	57	AEBX	No	36	Yes	Yes	No	No	No	No	No	Yes	Negative	10.05	7.08	1.88	167	209	0.17	3
AF8	Female	73	AEBX	No	36	Yes	Yes	Yes	No	No	Yes	No	Yes	EBV	5.51	3.35	1.6	114	252	/	3
AG2	Female	57	CAP	Yes	38	Yes	No	No	No	No	No	No	Yes	Negative	1.56	1.27	0.23	135	186	5.48	3
AG6	Male	64	Lung abscess	Yes	38	Yes	Yes	Yes	Yes	Yes	Yes	No	Yes	Negative	9.65	7.07	0.8	106	391	0.25	3
AH9	Male	38	HAP	Yes	40.2	No	No	No	Yes	No	Yes	No	No	/	11.67	11.02	0.36	131	155	1.23	1
AI14	Male	82	AEBX	No	36.6	Yes	Yes	No	No	No	No	Yes	No	/	10.58	7.96	1.57	117	286	0.22	3
AJ10	Male	59	CAP	Yes	39	Yes	Yes	Yes	Yes	No	Yes	No	Yes	Negative	3.15	2.74	0.37	150	198	11.08	3
AJ12	Male	67	CAP-ICH	No	39	Yes	Yes	No	No	Yes	Yes	No	Yes	HCMV	3.32	2.23	0.96	80	110	/	3
AJ13	Male	56	CAP-ICH	Yes	38	No	No	No	Yes	Yes	Yes	No	Yes	EBV	3.01	2.05	0.54	69	80	1.31	3
AL12	Male	71	HAP	Yes	36.5	No	Yes	Yes	Yes	No	Yes	No	No	/	4.81	2.94	1.43	134	176	1.53	2
AM5	Male	66	HAP	Yes	38	Yes	Yes	No	Yes	No	Yes	Yes	Yes	EBV	10.77	7.43	2.21	108	324	0.18	3
AO3	Female	62	CAP-ICH	No	40.2	Yes	Yes	Yes	Yes	Yes	Yes	No	Yes	Negative	13.03	11.82	0.72	101	217	0.25	3
AO9	Female	46	HAP	Yes	36.6	No	No	Yes	Yes	No	No	No	No	/	8.81	6.69	1.35	142	199	0.38	1
AP4	Female	55	AEBX	No	36.5	Yes	Yes	No	No	No	No	No	No	/	3.98	2.5	1.2	138	265	0.26	3
AR12	Male	85	AECOPD	No	39.5	Yes	Yes	No	No	No	No	No	Yes	Negative	8.83	7.41	0.49	96	41	8.84	3
AR15	Male	55	HAP	No	38.4	Yes	Yes	No	No	Yes	Yes	Yes	Yes	Influenza virus A、EBV	10.65	7.6	2.27	171	380	0.17	3
AR2	Female	73	AECOPD	Yes	37.5	Yes	Yes	No	Yes	No	Yes	No	Yes	Negative	10.9	8.9	1.51	106	121	0.43	1
AR7	Female	52	AEBX	No	36	Yes	Yes	No	No	No	No	Yes	No	/	7.39	4.02	2.23	124	385	0.29	3
AS1	Female	67	AEBX	No	39.8	Yes	Yes	No	No	No	No	No	Yes	Negative	9.85	7.66	1.31	78	303	0.24	3
AS3	Male	56	AEBX	Yes	38	Yes	Yes	Yes	Yes	No	Yes	No	Yes	Negative	10.25	8.58	0.85	139	249	0.55	3
AS7	Male	65	CAP-ICH	No	38.5	Yes	Yes	No	No	Yes	Yes	No	Yes	Negative	3.2	2.42	0.35	103	171	0.23	3
AS8	Male	63	HAP	No	37	Yes	Yes	No	No	No	Yes	Yes	Yes	Negative	6.8	4.33	1.81	138	186	0.19	3
AU2	Male	72	HAP	Yes	38.6	Yes	Yes	No	Yes	No	Yes	Yes	Yes	EBV、HCMV	7.86	6.67	0.72	90	372	0.19	3
AV2	Male	44	CAP-ICH	No	39.2	Yes	Yes	Yes	No	Yes	No	Yes	Yes	Influenza virus A、HCMV	9	4.94	3.45	136	291	0.58	3
AV6	Male	34	CAP-ICH	Yes	40	Yes	Yes	Yes	No	Yes	Yes	Yes	Yes	EBV	9.15	5.2	1.72	88	39	6.99	3
AV8	Male	73	HAP	Yes	36.5	Yes	Yes	No	No	Yes	Yes	No	Yes	Negative	5.09	3.45	1.08	88	143	0.16	3
AX8	Female	56	AEBX	No	36.7	Yes	Yes	No	No	Yes	Yes	No	Yes	Negative	4.75	2.6	1.62	136	255	0.27	3
AY7	Male	67	CAP-ICH	No	38.5	Yes	Yes	No	No	Yes	Yes	No	Yes	Influenza virus A	2.91	2.12	0.52	51	17	9.76	1
AZ4	Male	41	CAP	No	40.2	Yes	Yes	No	No	No	Yes	No	Yes	Negative	12.81	11.05	1.36	102	413	0.25	3
BA10	Male	65	HAP	Yes	36.9	Yes	Yes	Yes	Yes	No	Yes	Yes	Yes	Negative	11.85	10.36	1.28	130	171	0.32	1
BB11	Male	70	HAP	Yes	39.2	Yes	Yes	No	No	No	Yes	Yes	No	/	11.92	9.09	2.27	78	239	0.27	3
BB12	Male	70	HAP	No	36	Yes	Yes	No	No	No	No	Yes	No	/	5.78	5.91	0.41	131	109	0.26	2
BB16	Female	54	AECOPD	No	36.4	Yes	Yes	No	No	No	No	No	No	/	10.03	6.96	1.69	135	367	/	3
BB5	Male	64	HAP	No	36.7	Yes	Yes	No	No	Yes	No	Yes	Yes	Negative	7.25	5.59	0.59	120	337	/	3
BD5	Female	67	CAP-ICH	Yes	39.4	Yes	Yes	No	Yes	Yes	Yes	Yes	Yes	Influenza virus A	4.21	3.11	0.54	104	162	1.21	3
BD6	Male	79	AECOPD	Yes	38.4	Yes	Yes	Yes	No	No	Yes	No	Yes	Negative	12.05	11.28	0.51	123	116	0.19	3
BE4	Male	70	HAP	Yes	36.5	Yes	Yes	Yes	Yes	No	Yes	No	No	/	15.6	14.04	0.83	136	171	0.21	3
BE5	Male	67	AECOPD	No	36.4	Yes	Yes	No	No	No	No	No	No	/	6.16	3.37	1.96	177	224	/	3
BE6	Male	61	AECOPD	No	36.4	Yes	Yes	No	No	No	No	No	Yes	Influenza virus A	9.34	7.91	0.92	151	329	/	3
BE7	Female	89	HAP	Yes	37.8	No	No	No	No	No	Yes	No	Yes	HCMV	8.36	6.93	0.47	79	179	0.23	3
BF6	Female	69	AEBX	No	40.2	Yes	Yes	No	No	No	Yes	No	No	/	8.41	6.23	1.84	94	401	0.19	3
BF9	Female	83	HAP	Yes	36.7	No	No	No	Yes	No	Yes	No	No	/	4.16	2.93	0.9	109	191	0.16	3
BG2	Male	46	AEBX	No	37	Yes	Yes	No	No	No	Yes	No	No	/	7.61	3.66	3.28	138	224	0.19	3
BG5	Male	56	CAP	Yes	39.7	Yes	Yes	No	Yes	No	Yes	Yes	Yes	Influenza virus A	6.33	4.85	0.75	126	198	0.19	3
BH10	Male	65	AECOPD	No	36.4	Yes	Yes	No	No	No	Yes	No	No	/	13.65	11.62	1.31	127	409	0.27	3
BH13	Male	72	AECOPD	No	36.5	Yes	Yes	No	No	No	No	No	No	/	6.08	4.05	1.46	149	152	/	3
BH2	Female	77	Lung abscess	No	38.7	Yes	Yes	No	No	No	Yes	No	Yes	EBV、HCMV、RSV	7.33	6.37	0.25	99	265	0.49	3
BH4	Male	57	HAP	Yes	38.6	Yes	Yes	No	Yes	No	Yes	Yes	No	/	8.14	7.39	0.49	122	181	0.43	3
BH8	Male	58	AECOPD	No	36.5	Yes	Yes	No	No	No	Yes	Yes	Yes	Negative	11.41	8.4	1.9	131	277	0.27	3
CC6	Male	82	CAP	No	36.5	Yes	Yes	No	No	No	No	No	No	/	8.98	6.18	1.76	130	196	0.28	3
CF8	Female	86	HAP	Yes	38.9	Yes	Yes	No	Yes	No	Yes	No	Yes	Negative	15.2	14.07	0.53	102	238	0.41	2
CH5	Male	59	HAP	Yes	37.8	Yes	Yes	Yes	Yes	Yes	Yes	Yes	Yes	Negative	10.19	9.15	0.88	88	169	0.77	3
CH9	Male	57	AECOPD	No	36.3	Yes	Yes	No	No	No	Yes	Yes	No	/	11.97	9.34	1.8	141	740	0.27	3
CI11	Male	80	HAP	Yes	38.5	No	Yes	No	No	No	Yes	Yes	No	/	7.9	6.29	0.97	105	128	0.23	3
CI12	Female	78	CAP	Yes	38.5	No	No	No	No	No	Yes	No	No	/	11.48	10.85	0.25	110	70	0.68	3
CI8	Male	56	CAP	Yes	37.8	Yes	Yes	Yes	Yes	No	Yes	No	Yes	Influenza virus A	4.13	3.77	0.24	103	80	9.89	3
CI9	Male	49	HAP	Yes	38.4	Yes	Yes	No	Yes	No	Yes	Yes	No	/	33.42	30.32	1.3	100	443	0.49	3
CJ1	Male	77	CAP	Yes	39	Yes	Yes	No	Yes	No	Yes	No	Yes	Influenza virus A、EBV、RSV	8.78	8.3	0.28	145	116	0.22	2
CJ8	Male	42	HAP	Yes	37.8	No	No	No	Yes	No	Yes	Yes	No	/	12.21	8.41	2.1	136	343	0.37	3
CM2	Female	66	CAP	Yes	39	Yes	Yes	No	Yes	No	Yes	No	Yes	Influenza virus A	9.06	7.82	0.63	141	186	0.22	3
CN12	Male	50	CAP	Yes	39	Yes	Yes	Yes	No	No	Yes	Yes	Yes	Influenza virus A、HCMV	17.89	13.35	2.51	51	215	3.66	3
CO2	Male	54	Lung abscess	Yes	39	No	No	No	Yes	No	Yes	Yes	Yes	HCMV	11.47	10.2	0.77	91	254	0.39	3
CR4	Male	71	CAP	Yes	39	Yes	Yes	Yes	Yes	No	Yes	Yes	Yes	EBV	6.73	5.3	1.02	81	194	2.22	3
CR9	Male	33	HAP	Yes	39	Yes	Yes	No	Yes	No	Yes	No	Yes	EBV、HCMV	9.06	6.12	1.36	68	275	0.8	2
CS2	Female	33	AEBX	No	35.5	Yes	Yes	No	No	No	Yes	No	Yes	Negative	7.95	4.59	2.78	129	152	/	3
CS8	Male	69	HAP	Yes	38.2	Yes	Yes	No	Yes	No	Yes	No	Yes	Negative	18.65	16.25	1.56	122	274	0.36	1
CU11	Female	69	AEBX	No	36	Yes	Yes	No	No	No	Yes	No	No	/	6.14	3.55	1.86	109	298	0.29	3
CV12	Male	85	CAP	Yes	38.5	No	No	No	Yes	No	Yes	No	No	/	20.94	19.87	0.34	119	132	1.06	1
CV3	Female	70	CAP	No	37	Yes	Yes	No	No	No	Yes	No	Yes	Negative	5.44	3.23	1.6	104	217	/	3
CW2	Male	23	HAP	Yes	40	Yes	Yes	Yes	Yes	No	Yes	No	Yes	Adenovirus	12.81	11.94	0.54	73	84	0.61	3
CY4	Female	76	CAP	Yes	36.8	Yes	Yes	No	Yes	No	Yes	No	Yes	Negative	16.18	14.7	0.92	74	348	0.22	1
DA10	Female	28	CAP	Yes	38	Yes	Yes	Yes	No	No	Yes	No	Yes	Negative	18.57	15.94	1.14	85	69	1.66	3
DA3	Female	81	CAP	Yes	38.1	Yes	Yes	Yes	Yes	No	Yes	No	Yes	HCMV	14.12	12.81	0.5	88	146	3.19	3
DC11	Male	74	HAP	Yes	37	No	No	No	No	No	No	No	No	/	7.73	5.59	0.7	67	89	1.21	3
DC8	Female	76	HAP	Yes	37.7	No	No	No	Yes	No	Yes	No	No	/	9.2	6.43	1.64	77	203	0.33	3
DD10	Male	86	AECOPD	No	36.8	Yes	Yes	No	No	No	Yes	No	Yes	Negative	7.46	6.03	0.78	132	228	/	3
DD2	Male	40	CAP-ICH	Yes	38.9	Yes	Yes	Yes	Yes	Yes	Yes	No	Yes	Influenza virus A	2.73	1.94	0.19	114	120	17.71	2
DE5	Male	63	HAP	No	38.1	Yes	Yes	No	No	Yes	Yes	Yes	No	/	12.89	11.28	1.09	86	237	0.54	1
DE6	Male	54	CAP	Yes	39.9	Yes	Yes	No	Yes	No	Yes	Yes	No	/	5.34	4.65	0.62	81	136	4.98	2
DF9	Female	56	HAP	Yes	38	No	No	No	No	No	Yes	No	Yes	Negative	6.6	4.79	1.04	118	261	0.23	3
DG6	Female	15	AEBX	No	37	Yes	Yes	No	No	No	Yes	No	No	/	7.21	3.66	2.52	102	472	0.2	3
DH8	Male	66	CAP	No	39	Yes	Yes	No	No	No	Yes	No	Yes	Negative	8.73	6.77	1.28	99	345	0.75	3
DK111	Male	78	AECOPD	No	38.4	Yes	Yes	No	No	No	No	No	No	/	5.05	3.33	1.43	164	189	/	3
DK4	Female	56	AEBX	No	36.4	Yes	Yes	No	No	No	Yes	No	No	/	4.3	2.27	1.67	125	243	/	3
DM1	Male	64	HAP	Yes	38.7	Yes	Yes	No	No	No	Yes	No	Yes	HCMV	11.57	9.56	1.03	80	218	2.54	3
DM5	Female	66	AEBX	No	36	Yes	Yes	No	No	No	Yes	No	No	/	3.79	2.05	1.18	55	248	0.19	3
DN10	Male	72	AECOPD	No	36.4	Yes	Yes	No	No	No	Yes	Yes	No	/	12	9.5	1.32	126	217	0.08	3
DN11	Male	39	HAP	Yes	38.9	No	No	No	No	No	Yes	No	No	/	13.53	10.81	1.32	130	173	0.85	3
DO9	Male	52	CAP	No	37.2	Yes	Yes	No	No	No	Yes	Yes	Yes	Negative	20.61	18.86	0.84	157	325	3.74	3
DT2	Male	75	CAP	Yes	38.8	Yes	Yes	No	No	No	Yes	No	Yes	EBV、RSV	17.18	16.53	0.31	123	146	2.12	3
DT9	Female	64	CAP-ICH	Yes	37.6	Yes	Yes	No	No	Yes	Yes	No	Yes	EBV	24.09	23.48	0.22	92	176	0.6	1
DV1	Female	74	HAP	No	36.3	No	No	No	No	Yes	Yes	No	Yes	Negative	15.86	11.65	3.22	138	213	0.4	3
DW9	Female	63	AEBX	No	36.4	Yes	Yes	No	No	No	Yes	No	Yes	EBV	15.87	13.97	1.27	112	294	0.17	3
DX11	Female	56	AEBX	No	37	Yes	Yes	No	No	No	Yes	No	Yes	Influenza virus A HCMV EBV	5.14	3.55	1.36	101	192	0.12	3
DX12	Male	62	HAP	Yes	40	No	No	No	Yes	No	Yes	No	Yes	Negative	16.17	14.77	0.54	141	289	0.11	3
DX6	Male	56	HAP	Yes	38	Yes	Yes	No	Yes	No	Yes	Yes	No	/	13.08	6.04	1.37	79	161	9.94	3
EB10	Male	69	HAP	No	36.5	Yes	Yes	No	No	No	Yes	Yes	Yes	Parainfluenza virus	9.77	9.07	0.33	119	157	1.19	3
EE1	Female	77	HAP	Yes	37.4	Yes	Yes	Yes	Yes	No	Yes	No	Yes	Negative	11.5	10.49	0.62	96	112	0.96	1
EH6	Male	73	CAP	Yes	39.1	Yes	Yes	No	Yes	No	Yes	No	Yes	Negative	47.06	39.75	4.33	104	210	5.87	3
EK1	Male	58	CAP	Yes	39.4	Yes	Yes	Yes	Yes	No	Yes	Yes	Yes	EBV	5.9	5.36	0.33	115	186	10.15	1
EK2	Male	69	CAP-ICH	Yes	38.1	Yes	No	Yes	Yes	Yes	Yes	No	Yes	Negative	12.79	11.38	0.72	147	199	0.19	1
EK8	Female	65	AEBX	No	36	Yes	Yes	No	No	No	Yes	No	No	/	4.53	1.95	2.17	113	208	0.07	3
EL6	Female	76	CAP	Yes	38.8	No	No	No	Yes	No	Yes	No	Yes	Negative	1.47	0.27	0.88	65	103	8.91	1
ET4	Male	55	CAP-ICH	Yes	37.5	Yes	Yes	No	No	Yes	Yes	No	Yes	Negative	12.13	9.68	0.86	104	372	0.34	3
EU7	Male	81	CAP-ICH	Yes	37	No	No	No	No	Yes	Yes	No	No	/	7.39	5.79	1.12	129	199	/	3
EV1	Female	72	CAP	Yes	39	Yes	Yes	Yes	Yes	No	Yes	No	Yes	Negative	3.56	2.85	0.57	117	156	2.47	3
EX1	Male	67	AECOPD	Yes	36.5	Yes	Yes	No	Yes	No	Yes	No	Yes	Influenza virus A、EBV	7.95	6.92	0.6	196	190	0.25	2
EX6	Male	50	AEBX	No	37	Yes	Yes	No	No	No	Yes	No	No	/	9.62	5.49	3.22	129	308	/	3
EY2	Male	68	HAP	Yes	36.6	No	No	Yes	Yes	Yes	Yes	No	Yes	HCMV	13.76	12.02	0.54	85	484	0.47	3
FE3	Female	65	CAP-ICH	Yes	36.9	Yes	Yes	No	Yes	Yes	Yes	No	Yes	Negative	19.14	18.9	0.16	85	116	0.71	1
FF3	Female	73	CAP-ICH	Yes	39	Yes	Yes	Yes	Yes	Yes	Yes	No	Yes	HCMV	18.45	17.65	0.42	118	170	3.82	1
FF4	Female	62	HAP	Yes	39.2	Yes	Yes	No	Yes	No	Yes	No	Yes	HCMV	10.89	9.67	0.91	93	281	1.28	3
L24	Female	65	AEBX	No	36.5	Yes	Yes	No	No	No	No	No	No	/	5.58	3.39	1.5	121	245	0.26	3
M3	Male	77	HAP	Yes	38.5	Yes	Yes	Yes	No	No	Yes	No	Yes	Negative	4.95	4.12	0.21	102	139	0.82	2
M9	Male	91	CAP	Yes	37	Yes	Yes	No	Yes	No	No	No	Yes	Negative	1.83	1.15	0.6	100	237	16.05	1
N1	Male	33	CAP	Yes	36.8	Yes	Yes	Yes	No	No	Yes	Yes	Yes	Negative	2.55	2.13	0.33	136	166	8.49	3
N8	Male	69	AECOPD	Yes	37.1	Yes	Yes	Yes	Yes	No	Yes	No	Yes	EBV	13.62	12.24	0.89	78	64	0.78	2
O3	Female	64	CAP-ICH	Yes	37	Yes	No	Yes	No	Yes	No	No	Yes	RSV	5.58	4.93	0.28	87	114	0.39	3
O5	Male	86	HAP	Yes	36.5	Yes	Yes	Yes	No	No	Yes	No	No	/	12.2	10.55	0.9	64	27	3.75	1
O6	Male	61	HAP	Yes	38.2	No	No	No	Yes	No	Yes	No	No	/	15.91	13.93	0.57	101	104	0.88	1
O7	Male	44	HAP	Yes	39	Yes	Yes	No	No	No	Yes	No	No	/	5.12	3.14	1.44	99	210	0.2	3
P2	Male	59	Lung abscess	No	36.3	Yes	Yes	No	No	No	Yes	No	Yes	Negative	13.8	11.39	1.57	127	193	0.29	3
P7	Female	77	HAP	Yes	38.1	No	No	No	No	No	Yes	No	Yes	HCMV	4.89	3.45	1.02	102	70	0.51	3
T10	Female	76	HAP	Yes	38.2	No	No	No	Yes	No	Yes	No	Yes	RSV	8.59	6	1.48	140	144	0.26	3
V6	Male	60	HAP	Yes	36.9	No	No	Yes	Yes	No	Yes	No	No	/	10.32	8.68	0.94	74	269	0.15	3
W3	Female	35	Lung abscess	Yes	39	No	No	Yes	No	No	Yes	No	Yes	RSV	19.6	17.63	0.91	117	74	3.9	3
Y2	Male	63	CAP	No	37	Yes	Yes	No	No	No	No	No	Yes	EBV	8.05	5.78	1.76	134	296	0.17	3
Z5	Female	54	CAP-ICH	No	38.9	Yes	Yes	No	No	Yes	No	No	Yes	HCMV	12.85	11.09	1.05	112	276	0.19	3
Note：EBV：Epstein-Barr virus；RSV：Respiratory Syncytial Virus；HCMV：Human cytomegalovirus
Outcome:1,In-hospital mortality; 2,Withdrawal of life support; 3,Hospital discharge

## Sheet: 58%（169） Nanopore positive
Study ID	Gender	Age	Type of infection	ICU admission	Temp （℃）	Cough	Sputum	Dyspnea	Invasive mechanical ventilation	Immune Suppression	Prior Antibitoics	Current smoker	Virus detection	Virus results	WBC（× 109/L）	NEUT（× 109/L）	LYMPH（× 109/L）	HGB（g/L）	PLT（× 109/L）	PCT（ng/mL）	Outcome
AC1	Male	43	CAP-ICH	No	36.5	Yes	Yes	No	No	Yes	Yes	Yes	Yes	EBV、HCMV	4.55	2.67	1.47	148	282	0.29	3
AC11	Male	78	HAP	Yes	37	Yes	Yes	No	No	No	Yes	No	No	/	7.67	4.97	1.94	76	244	0.13	3
AD6	Female	43	HAP	Yes	37.9	No	No	Yes	Yes	No	Yes	No	No	/	3.92	2.38	1.18	137	103	2.55	3
AD7	Male	71	AECOPD	No	39	Yes	Yes	Yes	No	No	Yes	No	Yes	HCMV	8.36	6.75	0.85	103	267	0.22	3
AD8	Male	65	AECOPD	No	38.2	Yes	Yes	Yes	No	Yes	Yes	No	No	/	6.86	3.28	2.65	143	318	/	3
AE6	Male	46	CAP	No	38	Yes	Yes	No	No	No	Yes	No	Yes	Negative	6.97	3.45	2.29	164	231	0.19	3
AF17	Male	57	AEBX	No	36	Yes	Yes	No	No	No	No	No	Yes	Negative	10.05	7.08	1.88	167	209	0.17	3
AF8	Female	73	AEBX	No	36	Yes	Yes	Yes	No	No	Yes	No	Yes	EBV	5.51	3.35	1.6	114	252	/	3
AG2	Female	57	CAP	Yes	38	Yes	No	No	No	No	No	No	Yes	Negative	1.56	1.27	0.23	135	186	5.48	3
AH9	Male	38	HAP	Yes	40.2	No	No	No	Yes	No	Yes	No	No	/	11.67	11.02	0.36	131	155	1.23	1
AI14	Male	82	AEBX	No	36.6	Yes	Yes	No	No	No	No	Yes	No	/	10.58	7.96	1.57	117	286	0.22	3
AI5	Female	78	HAP	Yes	37.9	No	No	Yes	Yes	No	Yes	No	Yes	EBV	12.98	10.92	1.36	112	173	7	1
AJ10	Male	59	CAP	Yes	39	Yes	Yes	Yes	Yes	No	Yes	No	Yes	Negative	3.15	2.74	0.37	150	198	11.08	3
AJ12	Male	67	CAP-ICH	No	39	Yes	Yes	No	No	Yes	Yes	No	Yes	HCMV	3.32	2.23	0.96	80	110	/	3
AJ13	Male	56	CAP-ICH	Yes	38	No	No	No	Yes	Yes	Yes	No	Yes	EBV	3.01	2.05	0.54	69	80	1.31	3
AK2	Male	67	CAP	No	40	Yes	No	No	No	No	Yes	No	Yes	Negative	8.25	7.38	0.64	138	121	2.33	3
AK6	Male	76	HAP	Yes	38	No	No	No	Yes	No	No	Yes	No	/	5.41	3.76	1.21	124	104	0.14	3
AL12	Male	71	HAP	Yes	36.5	No	Yes	Yes	Yes	No	Yes	No	No	/	4.81	2.94	1.43	134	176	1.53	2
AM5	Male	66	HAP	Yes	38	Yes	Yes	No	Yes	No	Yes	Yes	Yes	EBV	10.77	7.43	2.21	108	324	0.18	3
AM8	Male	87	AECOPD	No	39.2	No	No	Yes	No	No	No	Yes	Yes	Negative	7.07	5	1.32	107	259	0.29	3
AN2	Female	78	HAP	Yes	39	Yes	Yes	No	Yes	No	Yes	No	Yes	EBV	8.44	7.49	0.56	55	53	1.29	3
AO2	Female	41	CAP-ICH	Yes	39	Yes	Yes	No	No	Yes	No	No	Yes	RSV	7.04	5.45	1.03	88	163	8.99	3
AO3	Female	62	CAP-ICH	No	40.2	Yes	Yes	Yes	Yes	Yes	Yes	No	Yes	Negative	13.03	11.82	0.72	101	217	0.25	3
AO9	Female	46	HAP	Yes	36.6	No	No	Yes	Yes	No	No	No	No	/	8.81	6.69	1.35	142	199	0.38	1
AP3	Male	59	CAP-ICH	No	38	Yes	Yes	No	No	Yes	Yes	No	Yes	EBV	4.49	3.85	0.26	91	125	0.82	3
AP4	Female	55	AEBX	No	36.5	Yes	Yes	No	No	No	No	No	No	/	3.98	2.5	1.2	138	265	0.26	3
AR12	Male	85	AECOPD	No	39.5	Yes	Yes	No	No	No	No	No	Yes	Negative	8.83	7.41	0.49	96	41	8.84	3
AR15	Male	55	HAP	No	38.4	Yes	Yes	No	No	Yes	Yes	Yes	Yes	Influenza virus A、EBV	10.65	7.6	2.27	171	380	0.17	3
AR2	Female	73	AECOPD	Yes	37.5	Yes	Yes	No	Yes	No	Yes	No	Yes	Negative	10.9	8.9	1.51	106	121	0.43	1
AR7	Female	52	AEBX	No	36	Yes	Yes	No	No	No	No	Yes	No	/	7.39	4.02	2.23	124	385	0.29	3
AS1	Female	67	AEBX	No	39.8	Yes	Yes	No	No	No	No	No	Yes	Negative	9.85	7.66	1.31	78	303	0.24	3
AS3	Male	56	AEBX	Yes	38	Yes	Yes	Yes	Yes	No	Yes	No	Yes	Negative	10.25	8.58	0.85	139	249	0.55	3
AS7	Male	65	CAP-ICH	No	38.5	Yes	Yes	No	No	Yes	Yes	No	Yes	Negative	3.2	2.42	0.35	103	171	0.23	3
AS8	Male	63	HAP	No	37	Yes	Yes	No	No	No	Yes	Yes	Yes	Negative	6.8	4.33	1.81	138	186	0.19	3
AU2	Male	72	HAP	Yes	38.6	Yes	Yes	No	Yes	No	Yes	Yes	Yes	EBV、HCMV	7.86	6.67	0.72	90	372	0.19	3
AU5	Male	80	AECOPD	No	41	Yes	Yes	No	No	No	Yes	No	Yes	Negative	3.41	1.8	1.25	128	38	0.58	3
AV2	Male	44	CAP-ICH	No	39.2	Yes	Yes	Yes	No	Yes	No	Yes	Yes	Influenza virus A、HCMV	9	4.94	3.45	136	291	0.58	3
AV6	Male	34	CAP-ICH	Yes	40	Yes	Yes	Yes	No	Yes	Yes	Yes	Yes	EBV	9.15	5.2	1.72	88	39	6.99	3
AV8	Male	73	HAP	Yes	36.5	Yes	Yes	No	No	Yes	Yes	No	Yes	Negative	5.09	3.45	1.08	88	143	0.16	3
AX105	Male	75	HAP	No	37.7	No	No	No	No	No	No	No	No	/	7.11	5.56	0.67	139	106	0.17	3
AY4	Female	26	Lung abscess	Yes	39.5	Yes	Yes	No	Yes	No	Yes	No	Yes	Influenza virus A、EBV	5.14	4.69	0.25	107	272	0.24	1
AY7	Male	67	CAP-ICH	No	38.5	Yes	Yes	No	No	Yes	Yes	No	Yes	Influenza virus A	2.91	2.12	0.52	51	17	9.76	1
BA1	Male	59	CAP	Yes	40	Yes	Yes	Yes	Yes	No	Yes	Yes	Yes	Influenza virus A	13.02	11.79	0.8	95	171	6.03	1
BA10	Male	65	HAP	Yes	36.9	Yes	Yes	Yes	Yes	No	Yes	Yes	Yes	Negative	11.85	10.36	1.28	130	171	0.32	1
BA6	Female	60	AEBX	No	38	Yes	Yes	No	No	No	Yes	No	Yes	Negative	10.6	8.29	1.52	138	202	0.02	3
BB11	Male	70	HAP	Yes	39.2	Yes	Yes	No	No	No	Yes	Yes	No	/	11.92	9.09	2.27	78	239	0.27	3
BB12	Male	70	HAP	No	36	Yes	Yes	No	No	No	No	Yes	No	/	5.78	5.91	0.41	131	109	0.26	2
BB16	Female	54	AECOPD	No	36.4	Yes	Yes	No	No	No	No	No	No	/	10.03	6.96	1.69	135	367	/	3
BC8	Female	72	HAP	No	38.5	Yes	Yes	No	No	No	Yes	No	Yes	Influenza virus A	5.94	4.97	0.6	94	403	0.55	3
BD5	Female	67	CAP-ICH	Yes	39.4	Yes	Yes	No	Yes	Yes	Yes	Yes	Yes	Influenza virus A	4.21	3.11	0.54	104	162	1.21	3
BE4	Male	70	HAP	Yes	36.5	Yes	Yes	Yes	Yes	No	Yes	No	No	/	15.6	14.04	0.83	136	171	0.21	3
BE5	Male	67	AECOPD	No	36.4	Yes	Yes	No	No	No	No	No	No	/	6.16	3.37	1.96	177	224	/	3
BE6	Male	61	AECOPD	No	36.4	Yes	Yes	No	No	No	No	No	Yes	Influenza virus A	9.34	7.91	0.92	151	329	/	3
BE7	Female	89	HAP	Yes	37.8	No	No	No	No	No	Yes	No	Yes	HCMV	8.36	6.93	0.47	79	179	0.23	3
BF5	Male	38	AEBX	No	37.5	Yes	Yes	No	No	Yes	Yes	No	Yes	adenovirus	5.79	3.19	1.93	133	100	1.77	3
BF6	Female	69	AEBX	No	40.2	Yes	Yes	No	No	No	Yes	No	No	/	8.41	6.23	1.84	94	401	0.19	3
BF9	Female	83	HAP	Yes	36.7	No	No	No	Yes	No	Yes	No	No	/	4.16	2.93	0.9	109	191	0.16	3
BG2	Male	46	AEBX	No	37	Yes	Yes	No	No	No	Yes	No	No	/	7.61	3.66	3.28	138	224	0.19	3
BG5	Male	56	CAP	Yes	39.7	Yes	Yes	No	Yes	No	Yes	Yes	Yes	Influenza virus A	6.33	4.85	0.75	126	198	0.19	3
BH10	Male	65	AECOPD	No	36.4	Yes	Yes	No	No	No	Yes	No	No	/	13.65	11.62	1.31	127	409	0.27	3
BH13	Male	72	AECOPD	No	36.5	Yes	Yes	No	No	No	No	No	No	/	6.08	4.05	1.46	149	152	/	3
BH2	Female	77	Lung abscess	No	38.7	Yes	Yes	No	No	No	Yes	No	Yes	EBV、HCMV、RSV	7.33	6.37	0.25	99	265	0.49	3
BH4	Male	57	HAP	Yes	38.6	Yes	Yes	No	Yes	No	Yes	Yes	No	/	8.14	7.39	0.49	122	181	0.43	3
CC2	Male	56	Lung abscess	Yes	38.5	Yes	Yes	No	Yes	No	Yes	No	Yes	Negative	13.22	12.03	0.73	84	102	0.56	2
CC5	Female	77	AEBX	No	39	Yes	Yes	No	No	No	Yes	No	Yes	Negative	7.87	5.98	1.1	108	161	0.55	3
CC6	Male	82	CAP	No	36.5	Yes	Yes	No	No	No	No	No	No	/	8.98	6.18	1.76	130	196	0.28	3
CF2	Male	56	CAP-ICH	No	39.5	No	No	No	No	Yes	Yes	Yes	No	/	0.43	0.14	0.17	64	60	2.05	3
CH5	Male	59	HAP	Yes	37.8	Yes	Yes	Yes	Yes	Yes	Yes	Yes	Yes	Negative	10.19	9.15	0.88	88	169	0.77	3
CH9	Male	57	AECOPD	No	36.3	Yes	Yes	No	No	No	Yes	Yes	No	/	11.97	9.34	1.8	141	740	0.27	3
CI11	Male	80	HAP	Yes	38.5	No	Yes	No	No	No	Yes	Yes	No	/	7.9	6.29	0.97	105	128	0.23	3
CI12	Female	78	CAP	Yes	38.5	No	No	No	No	No	Yes	No	No	/	11.48	10.85	0.25	110	70	0.68	3
CI8	Male	56	CAP	Yes	37.8	Yes	Yes	Yes	Yes	No	Yes	No	Yes	Influenza virus A	4.13	3.77	0.24	103	80	9.89	3
CI9	Male	49	HAP	Yes	38.4	Yes	Yes	No	Yes	No	Yes	Yes	No	/	33.42	30.32	1.3	100	443	0.49	3
CJ1	Male	77	CAP	Yes	39	Yes	Yes	No	Yes	No	Yes	No	Yes	Influenza virus A、EBV、RSV	8.78	8.3	0.28	145	116	0.22	2
CJ8	Male	42	HAP	Yes	37.8	No	No	No	Yes	No	Yes	Yes	No	/	12.21	8.41	2.1	136	343	0.37	3
CM2	Female	66	CAP	Yes	39	Yes	Yes	No	Yes	No	Yes	No	Yes	Influenza virus A	9.06	7.82	0.63	141	186	0.22	3
CM3	Male	63	CAP	No	37	Yes	Yes	No	No	No	Yes	No	Yes	Negative	10.92	8.48	1.6	139	436	0.49	3
CN12	Male	50	CAP	Yes	39	Yes	Yes	Yes	No	No	Yes	Yes	Yes	Influenza virus A、HCMV	17.89	13.35	2.51	51	215	3.66	3
CN8	Female	63	Lung abscess	No	38.2	No	No	Yes	No	No	Yes	Yes	Yes	HCMV	14.1	13.42	0.32	122	365	0.48	3
CO2	Male	54	Lung abscess	Yes	39	No	No	No	Yes	No	Yes	Yes	Yes	HCMV	11.47	10.2	0.77	91	254	0.39	3
CR1	Male	65	CAP	Yes	40	Yes	Yes	Yes	Yes	No	Yes	Yes	Yes	Negative	8.82	7.87	0.68	130	161	0.49	2
CR4	Male	71	CAP	Yes	39	Yes	Yes	Yes	Yes	No	Yes	Yes	Yes	EBV	6.73	5.3	1.02	81	194	2.22	3
CS13	Male	68	AEBX	No	36	Yes	Yes	No	No	No	Yes	Yes	No	/	8.43	6.43	1.43	149	164	0.26	3
CS2	Female	33	AEBX	No	35.5	Yes	Yes	No	No	No	Yes	No	Yes	Negative	7.95	4.59	2.78	129	152	/	3
CS8	Male	69	HAP	Yes	38.2	Yes	Yes	No	Yes	No	Yes	No	Yes	Negative	18.65	16.25	1.56	122	274	0.36	1
CU11	Female	69	AEBX	No	36	Yes	Yes	No	No	No	Yes	No	No	/	6.14	3.55	1.86	109	298	0.29	3
CU5	Female	39	CAP-ICH	No	38	Yes	Yes	Yes	No	Yes	Yes	No	Yes	Negative	2.72	1.67	0.65	83	141	0.27	3
CU6	Female	62	CAP	No	39.3	Yes	Yes	No	No	No	Yes	No	Yes	Negative	4.5	2.82	1.06	104	231	0.26	3
CV10	Male	71	CAP	Yes	38.6	Yes	Yes	Yes	No	No	Yes	Yes	Yes	Negative	7.36	6.02	0.89	114	191	0.68	3
CV12	Male	85	CAP	Yes	38.5	No	No	No	Yes	No	Yes	No	No	/	20.94	19.87	0.34	119	132	1.06	1
CV14	Male	85	CAP-ICH	Yes	37.7	No	No	No	Yes	Yes	Yes	No	Yes	EBV RSV	9.03	6.02	1.51	114	41	8.69	3
CV3	Female	70	CAP	No	37	Yes	Yes	No	No	No	Yes	No	Yes	Negative	5.44	3.23	1.6	104	217	/	3
CW2	Male	23	HAP	Yes	40	Yes	Yes	Yes	Yes	No	Yes	No	Yes	adenovirus	12.81	11.94	0.54	73	84	0.61	3
CY4	Female	76	CAP	Yes	36.8	Yes	Yes	No	Yes	No	Yes	No	Yes	Negative	16.18	14.7	0.92	74	348	0.22	1
CZ4	Female	78	CAP	Yes	39.5	Yes	Yes	No	Yes	No	Yes	No	Yes	Negative	2.19	1.71	0.2	75	23	3.39	1
DA10	Female	28	CAP	Yes	38	Yes	Yes	Yes	No	No	Yes	No	Yes	Negative	18.57	15.94	1.14	85	69	1.66	3
DA3	Female	81	CAP	Yes	38.1	Yes	Yes	Yes	Yes	No	Yes	No	Yes	HCMV	14.12	12.81	0.5	88	146	3.19	3
DC11	Male	74	HAP	Yes	37	No	No	No	No	No	No	No	No	/	7.73	5.59	0.7	67	89	1.21	3
DC8	Female	76	HAP	Yes	37.7	No	No	No	Yes	No	Yes	No	No	/	9.2	6.43	1.64	77	203	0.33	3
DD12	Male	50	CAP	Yes	37	No	No	No	No	No	Yes	No	No	/	7.27	6.57	0.51	113	122	0.22	3
DD2	Male	40	CAP-ICH	Yes	38.9	Yes	Yes	Yes	Yes	Yes	Yes	No	Yes	Influenza virus A	2.73	1.94	0.19	114	120	17.71	2
DE5	Male	63	HAP	No	38.1	Yes	Yes	No	No	Yes	Yes	Yes	No	/	12.89	11.28	1.09	86	237	0.54	1
DE6	Male	54	CAP	Yes	39.9	Yes	Yes	No	Yes	No	Yes	Yes	No	/	5.34	4.65	0.62	81	136	4.98	2
DF9	Female	56	HAP	Yes	38	No	No	No	No	No	Yes	No	Yes	Negative	6.6	4.79	1.04	118	261	0.23	3
DG6	Female	15	AEBX	No	37	Yes	Yes	No	No	No	Yes	No	No	/	7.21	3.66	2.52	102	472	0.2	3
DH8	Male	66	CAP	No	39	Yes	Yes	No	No	No	Yes	No	Yes	Negative	8.73	6.77	1.28	99	345	0.75	3
DI4	Male	62	CAP-ICH	Yes	37.6	Yes	Yes	No	No	Yes	No	Yes	Yes	EBV HCMV	7.84	6.3	1.18	112	216	/	3
DI8	Male	89	HAP	Yes	38.3	No	No	No	No	No	Yes	No	No	/	13.15	9.72	2.16	126	401	0.11	3
DK111	Male	78	AECOPD	No	38.4	Yes	Yes	No	No	No	No	No	No	/	5.05	3.33	1.43	164	189	/	3
DK4	Female	56	AEBX	No	36.4	Yes	Yes	No	No	No	Yes	No	No	/	4.3	2.27	1.67	125	243	/	3
DK6	Male	71	Lung abscess	No	39.7	Yes	Yes	No	No	No	Yes	No	Yes	Negative	20.33	16.99	2.41	125	314	0.13	3
DL13	Male	72	CAP	No	39.8	Yes	Yes	No	No	No	No	Yes	Yes	HCMV	6.74	4.24	1.85	116	220	/	3
DM1	Male	64	HAP	Yes	38.7	Yes	Yes	No	No	No	Yes	No	Yes	HCMV	11.57	9.56	1.03	80	218	2.54	3
DM5	Female	66	AEBX	No	36	Yes	Yes	No	No	No	Yes	No	No	/	3.79	2.05	1.18	55	248	0.19	3
DM9	Male	90	AECOPD	No	36.4	Yes	Yes	No	No	No	Yes	No	No	/	13.77	12.72	0.71	154	136	13.8	3
DN10	Male	72	AECOPD	No	36.4	Yes	Yes	No	No	No	Yes	Yes	No	/	12	9.5	1.32	126	217	0.08	3
DN11	Male	39	HAP	Yes	38.9	No	No	No	No	No	Yes	No	No	/	13.53	10.81	1.32	130	173	0.85	3
DO9	Male	52	CAP	No	37.2	Yes	Yes	No	No	No	Yes	Yes	Yes	Negative	20.61	18.86	0.84	157	325	3.74	3
DT2	Male	75	CAP	Yes	38.8	Yes	Yes	No	No	No	Yes	No	Yes	EBV RSV	17.18	16.53	0.31	123	146	2.12	3
DV1	Female	74	HAP	No	36.3	No	No	No	No	Yes	Yes	No	Yes	Negative	15.86	11.65	3.22	138	213	0.4	3
DW9	Female	63	AEBX	No	36.4	Yes	Yes	No	No	No	Yes	No	Yes	EBV	15.87	13.97	1.27	112	294	0.17	3
DX11	Female	56	AEBX	No	37	Yes	Yes	No	No	No	Yes	No	Yes	Influenza virus A HCMV EBV	5.14	3.55	1.36	101	192	0.12	3
DX12	Male	62	HAP	Yes	40	No	No	No	Yes	No	Yes	No	Yes	Negative	16.17	14.77	0.54	141	289	0.11	3
DX6	Male	56	HAP	Yes	38	Yes	Yes	No	Yes	No	Yes	Yes	No	/	13.08	6.04	1.37	79	161	9.94	3
EB10	Male	69	HAP	No	36.5	Yes	Yes	No	No	No	Yes	Yes	Yes	Parainfluenza virus	9.77	9.07	0.33	119	157	1.19	3
EB2	Male	54	CAP	Yes	38.5	No	No	No	Yes	No	Yes	No	Yes	Negative	6.72	3.46	2.14	154	197	0.02	2
EC5	Male	60	AECOPD	Yes	36.6	Yes	Yes	Yes	Yes	No	Yes	No	Yes	Negative	10.75	10	0.54	172	151	0.09	3
EE1	Female	77	HAP	Yes	37.4	Yes	Yes	Yes	Yes	No	Yes	No	Yes	Negative	11.5	10.49	0.62	96	112	0.96	1
EH6	Male	73	CAP	Yes	39.1	Yes	Yes	No	Yes	No	Yes	No	Yes	Negative	47.06	39.75	4.33	104	210	5.87	3
EK1	Male	58	CAP	Yes	39.4	Yes	Yes	Yes	Yes	No	Yes	Yes	Yes	EBV	5.9	5.36	0.33	115	186	10.15	1
EK2	Male	69	CAP-ICH	Yes	38.1	Yes	No	Yes	Yes	Yes	Yes	No	Yes	Negative	12.79	11.38	0.72	147	199	0.19	1
EK8	Female	65	AEBX	No	36	Yes	Yes	No	No	No	Yes	No	No	/	4.53	1.95	2.17	113	208	0.07	3
EL6	Female	76	CAP	Yes	38.8	No	No	No	Yes	No	Yes	No	Yes	Negative	1.47	0.27	0.88	65	103	8.91	1
EM5	Male	84	CAP	Yes	39	Yes	Yes	No	Yes	No	Yes	No	Yes	EBV	24.44	22.9	0.57	161	207	5.36	1
ET4	Male	55	CAP-ICH	Yes	37.5	Yes	Yes	No	No	Yes	Yes	No	Yes	Negative	12.13	9.68	0.86	104	372	0.34	3
EU7	Male	81	CAP-ICH	Yes	37	No	No	No	No	Yes	Yes	No	No	/	7.39	5.79	1.12	129	199	/	3
EV1	Female	72	CAP	Yes	39	Yes	Yes	Yes	Yes	No	Yes	No	Yes	Negative	3.56	2.85	0.57	117	156	2.47	3
EX1	Male	67	AECOPD	Yes	36.5	Yes	Yes	No	Yes	No	Yes	No	Yes	Influenza virus A EBV	7.95	6.92	0.6	196	190	0.25	2
EX6	Male	50	AEBX	No	37	Yes	Yes	No	No	No	Yes	No	No	/	9.62	5.49	3.22	129	308	/	3
EY2	Male	68	HAP	Yes	36.6	No	No	Yes	Yes	Yes	Yes	No	Yes	HCMV	13.76	12.02	0.54	85	484	0.47	3
FE3	Female	65	CAP-ICH	Yes	36.9	Yes	Yes	No	Yes	Yes	Yes	No	Yes	Negative	19.14	18.9	0.16	85	116	0.71	1
FF3	Female	73	CAP-ICH	Yes	39	Yes	Yes	Yes	Yes	Yes	Yes	No	Yes	HCMV	18.45	17.65	0.42	118	170	3.82	1
FF4	Female	62	HAP	Yes	39.2	Yes	Yes	No	Yes	No	Yes	No	Yes	HCMV	10.89	9.67	0.91	93	281	1.28	3
FF8	Male	58	AECOPD	No	38.6	Yes	Yes	No	No	No	Yes	Yes	Yes	Negative	9.49	4.96	2.85	133	391	0.12	3
L22	Male	54	CAP	No	38.7	Yes	Yes	No	No	No	Yes	Yes	Yes	Negative	12.75	9.85	1.78	178	175	0.2	3
L24	Female	65	AEBX	No	36.5	Yes	Yes	No	No	No	No	No	No	/	5.58	3.39	1.5	121	245	0.26	3
M3	Male	77	HAP	Yes	38.5	Yes	Yes	Yes	No	No	Yes	No	Yes	Negative	4.95	4.12	0.21	102	139	0.82	2
M8	Male	19	HAP	Yes	38	Yes	Yes	Yes	No	No	Yes	No	Yes	Negative	3.39	2.04	0.58	55	122	0.61	3
M9	Male	91	CAP	Yes	37	Yes	Yes	No	Yes	No	No	No	Yes	Negative	1.83	1.15	0.6	100	237	16.05	1
N1	Male	33	CAP	Yes	36.8	Yes	Yes	Yes	No	No	Yes	Yes	Yes	Negative	2.55	2.13	0.33	136	166	8.49	3
O3	Female	64	CAP-ICH	Yes	37	Yes	No	Yes	No	Yes	No	No	Yes	RSV	5.58	4.93	0.28	87	114	0.39	3
O5	Male	86	HAP	Yes	36.5	Yes	Yes	Yes	No	No	Yes	No	No	/	12.2	10.55	0.9	64	27	3.75	1
O6	Male	61	HAP	Yes	38.2	No	No	No	Yes	No	Yes	No	No	/	15.91	13.93	0.57	101	104	0.88	1
O7	Male	44	HAP	Yes	39	Yes	Yes	No	No	No	Yes	No	No	/	5.12	3.14	1.44	99	210	0.2	3
P2	Male	59	Lung abscess	No	36.3	Yes	Yes	No	No	No	Yes	No	Yes	Negative	13.8	11.39	1.57	127	193	0.29	3
P5	Male	66	CAP-ICH	Yes	39.2	Yes	No	Yes	No	Yes	Yes	No	Yes	EBV HCMV	4.93	3.72	1.08	86	89	0.43	3
P7	Female	77	HAP	Yes	38.1	No	No	No	No	No	Yes	No	Yes	HCMV	4.89	3.45	1.02	102	70	0.51	3
Q5	Female	37	Lung abscess	No	37.5	Yes	Yes	No	No	No	Yes	No	No	/	14.87	12.23	1.36	109	583	0.19	3
R5	Male	78	HAP	Yes	38.5	No	No	No	Yes	No	Yes	No	No	/	17.14	15.45	0.73	116	113	0.39	3
R6	Female	69	CAP-ICH	Yes	36	Yes	Yes	No	No	Yes	Yes	No	Yes	EBV	4.67	3.44	0.88	78	100	0.69	3
S11	Female	81	CAP	No	38	Yes	Yes	No	No	No	Yes	No	Yes	Negative	5.86	4.89	0.38	93	170	0.21	3
T10	Female	76	HAP	Yes	38.2	No	No	No	Yes	No	Yes	No	Yes	RSV	8.59	6	1.48	140	144	0.26	3
T16	Female	60	AEBX	No	36.3	Yes	Yes	No	No	No	No	No	Yes	Negative	6.16	3.79	1.83	134	185	0.3	3
V6	Male	60	HAP	Yes	36.9	No	No	Yes	Yes	No	Yes	No	No	/	10.32	8.68	0.94	74	269	0.15	3
W3	Female	35	Lung abscess	Yes	39	No	No	Yes	No	No	Yes	No	Yes	RSV	19.6	17.63	0.91	117	74	3.9	3
Y13	Male	86	CAP	No	38.2	Yes	No	No	No	No	Yes	No	Yes	EBV	5.61	3.64	1.28	90	174	0.65	3
Y2	Male	63	CAP	No	37	Yes	Yes	No	No	No	No	No	Yes	EBV	8.05	5.78	1.76	134	296	0.17	3
Z5	Female	54	CAP-ICH	No	38.9	Yes	Yes	No	No	Yes	No	No	Yes	HCMV	12.85	11.09	1.05	112	276	0.19	3
Z7	Male	62	AECOPD	Yes	38	Yes	Yes	No	No	No	Yes	Yes	Yes	RSV	6.66	5.7	0.67	139	171	0.17	3
Note：EBV：Epstein-Barr virus；RSV：Respiratory Syncytial Virus；HCMV：Human cytomegalovirus
Outcome:1,In-hospital mortality; 2,Withdrawal of life support; 3,Hospital discharge
